# Supplementary material for: A functional bacteria-derived restriction modification system in the mitochondrion of a heterotrophic protist
Source: PLoS Biol. 2021 Apr 23;19(4):e3001126. doi: 10.1371/journal.pbio.3001126 (PMC8099122; doi:10.1371/journal.pbio.3001126)
Supplement: S6 Data — All data used to create S3 Fig; “sd” = standard deviation from the mean. (XLSX) [file pbio.3001126.s013.xlsx]

## Sheet: S6 Data
S6 Data
Underlying data for S3 Fig
														CM- endo-		CM- MutH+
Time	CM- endo-	CM- MutH+		Average	CM- endo-	CM- MutH+		Average	CM- endo-	CM- MutH+		Average		Average	sd	Average	sd
0	0.249	0.257	0.261	0.259	0.286	0.262	0.269	0.2655	0.251	0.264	0.274	0.269		0.262	0.0208087	0.2645	0.00507445
5	0.257	0.259	0.263	0.261	0.283	0.266	0.269	0.2675	0.256	0.267	0.27	0.2685		0.265333	0.015308	0.265667	0.00407226
10	0.258	0.259	0.262	0.2605	0.279	0.264	0.266	0.265	0.256	0.263	0.263	0.263		0.264333	0.012741	0.262833	0.00225462
15	0.268	0.268	0.271	0.2695	0.294	0.275	0.278	0.2765	0.267	0.278	0.278	0.278		0.276333	0.015308	0.274667	0.00453689
20	0.266	0.266	0.268	0.267	0.285	0.269	0.272	0.2705	0.263	0.269	0.269	0.269		0.271333	0.0119304	0.268833	0.00175594
25	0.268	0.268	0.272	0.27	0.293	0.276	0.277	0.2765	0.267	0.277	0.276	0.2765		0.276	0.0147309	0.274333	0.00375278
30	0.273	0.271	0.275	0.273	0.295	0.278	0.28	0.279	0.271	0.281	0.279	0.28		0.279667	0.0133167	0.277333	0.00378594
35	0.273	0.271	0.276	0.2735	0.293	0.278	0.279	0.2785	0.269	0.28	0.277	0.2785		0.278333	0.0128582	0.276833	0.00288675
40	0.274	0.274	0.277	0.2755	0.294	0.278	0.282	0.28	0.273	0.282	0.279	0.2805		0.280333	0.0118462	0.278667	0.00275379
45	0.277	0.277	0.281	0.279	0.297	0.282	0.285	0.2835	0.277	0.287	0.283	0.285		0.283667	0.011547	0.2825	0.0031225
50	0.281	0.283	0.286	0.2845	0.302	0.286	0.289	0.2875	0.281	0.291	0.288	0.2895		0.288	0.0121244	0.287167	0.00251661
55	0.285	0.287	0.292	0.2895	0.309	0.292	0.296	0.294	0.285	0.296	0.293	0.2945		0.293	0.0138564	0.292667	0.00275379
60	0.29	0.292	0.295	0.2935	0.314	0.298	0.301	0.2995	0.291	0.302	0.298	0.3		0.298333	0.0135769	0.297667	0.00361709
65	0.289	0.294	0.298	0.296	0.311	0.296	0.3	0.298	0.291	0.304	0.296	0.3		0.297	0.0121655	0.298	0.002
70	0.293	0.3	0.303	0.3015	0.316	0.304	0.305	0.3045	0.297	0.311	0.301	0.306		0.302	0.0122882	0.304	0.00229129
75	0.306	0.311	0.315	0.313	0.329	0.314	0.316	0.315	0.307	0.319	0.313	0.316		0.314	0.013	0.314667	0.00152753
80	0.307	0.315	0.318	0.3165	0.328	0.316	0.318	0.317	0.315	0.324	0.314	0.319		0.316667	0.0105987	0.3175	0.00132288
85	0.319	0.326	0.329	0.3275	0.341	0.327	0.33	0.3285	0.32	0.335	0.325	0.33		0.326667	0.0124231	0.328667	0.00125831
90	0.325	0.329	0.334	0.3315	0.348	0.332	0.334	0.333	0.329	0.343	0.333	0.338		0.334	0.0122882	0.334167	0.00340343
95	0.338	0.346	0.35	0.348	0.361	0.34	0.345	0.3425	0.34	0.358	0.348	0.353		0.346333	0.012741	0.347833	0.00525198
100	0.339	0.349	0.352	0.3505	0.355	0.342	0.344	0.343	0.341	0.359	0.346	0.3525		0.345	0.0087178	0.348667	0.00500833
105	0.352	0.366	0.366	0.366	0.367	0.356	0.358	0.357	0.353	0.37	0.358	0.364		0.357333	0.0083865	0.362333	0.00472582
110	0.354	0.361	0.365	0.363	0.379	0.361	0.36	0.3605	0.363	0.375	0.366	0.3705		0.365333	0.0126623	0.364667	0.00520416
115	0.374	0.374	0.377	0.3755	0.386	0.369	0.374	0.3715	0.369	0.378	0.367	0.3725		0.376333	0.00873689	0.373167	0.00208167
120	0.377	0.378	0.379	0.3785	0.385	0.372	0.374	0.373	0.373	0.379	0.368	0.3735		0.378333	0.0061101	0.375	0.00304138
125	0.381	0.381	0.382	0.3815	0.39	0.374	0.376	0.375	0.379	0.388	0.375	0.3815		0.383333	0.00585947	0.379333	0.00375278
130	0.384	0.385	0.385	0.385	0.395	0.38	0.383	0.3815	0.38	0.387	0.374	0.3805		0.386333	0.00776745	0.382333	0.00236291
135	0.388	0.385	0.387	0.386	0.403	0.383	0.385	0.384	0.385	0.391	0.386	0.3885		0.392	0.00964365	0.386167	0.00225462
140	0.388	0.388	0.39	0.389	0.398	0.384	0.388	0.386	0.385	0.391	0.381	0.386		0.390333	0.00680686	0.387	0.00173205
145	0.392	0.392	0.392	0.392	0.405	0.386	0.391	0.3885	0.387	0.394	0.385	0.3895		0.394667	0.00929157	0.39	0.00180278
150	0.394	0.396	0.398	0.397	0.41	0.394	0.398	0.396	0.394	0.403	0.392	0.3975		0.399333	0.0092376	0.396833	0.000763763
155	0.397	0.398	0.398	0.398	0.411	0.396	0.398	0.397	0.396	0.404	0.393	0.3985		0.401333	0.0083865	0.397833	0.000763763
160	0.403	0.404	0.404	0.404	0.419	0.4	0.403	0.4015	0.4	0.409	0.4	0.4045		0.407333	0.0102144	0.403333	0.00160728
165	0.4	0.403	0.404	0.4035	0.409	0.398	0.399	0.3985	0.401	0.41	0.398	0.404		0.403333	0.00493288	0.402	0.00304138
170	0.407	0.411	0.411	0.411	0.423	0.409	0.41	0.4095	0.411	0.42	0.41	0.415		0.413667	0.00832666	0.411833	0.00284312
175	0.417	0.42	0.419	0.4195	0.436	0.418	0.419	0.4185	0.418	0.427	0.419	0.423		0.423667	0.0106927	0.420333	0.00236291
180	0.423	0.428	0.427	0.4275	0.446	0.428	0.428	0.428	0.425	0.436	0.427	0.4315		0.431333	0.012741	0.429	0.00217945
185	0.423	0.428	0.429	0.4285	0.437	0.426	0.425	0.4255	0.425	0.435	0.427	0.431		0.428333	0.00757188	0.428333	0.00275379
190	0.433	0.438	0.438	0.438	0.449	0.436	0.436	0.436	0.432	0.443	0.434	0.4385		0.438	0.00953939	0.4375	0.00132288
195	0.438	0.446	0.443	0.4445	0.456	0.44	0.442	0.441	0.439	0.452	0.441	0.4465		0.444333	0.010116	0.444	0.00278388
200	0.448	0.453	0.452	0.4525	0.467	0.45	0.449	0.4495	0.445	0.46	0.449	0.4545		0.453333	0.0119304	0.452167	0.00251661
205	0.456	0.463	0.462	0.4625	0.473	0.456	0.455	0.4555	0.453	0.467	0.454	0.4605		0.460667	0.0107858	0.4595	0.00360555
210	0.467	0.473	0.471	0.472	0.486	0.469	0.469	0.469	0.467	0.484	0.473	0.4785		0.473333	0.0109697	0.473167	0.00485627
215	0.468	0.478	0.474	0.476	0.485	0.472	0.472	0.472	0.472	0.489	0.476	0.4825		0.475	0.00888819	0.476833	0.00529937
220	0.482	0.491	0.49	0.4905	0.503	0.488	0.486	0.487	0.484	0.504	0.49	0.497		0.489667	0.0115902	0.4915	0.00507445
225	0.493	0.5	0.498	0.499	0.513	0.496	0.495	0.4955	0.496	0.51	0.499	0.5045		0.500667	0.0107858	0.499667	0.00453689
230	0.509	0.517	0.512	0.5145	0.526	0.507	0.507	0.507	0.506	0.522	0.509	0.5155		0.513667	0.0107858	0.512333	0.00464579
235	0.513	0.522	0.518	0.52	0.528	0.513	0.511	0.512	0.513	0.523	0.508	0.5155		0.518	0.00866025	0.515833	0.0040104
240	0.522	0.526	0.524	0.525	0.538	0.523	0.522	0.5225	0.525	0.538	0.524	0.531		0.528333	0.0085049	0.526167	0.00436845
245	0.53	0.535	0.532	0.5335	0.539	0.527	0.528	0.5275	0.526	0.537	0.523	0.53		0.531667	0.00665833	0.530333	0.00301386
250	0.542	0.547	0.543	0.545	0.554	0.537	0.537	0.537	0.538	0.552	0.54	0.546		0.544667	0.00832666	0.542667	0.00493288
255	0.546	0.551	0.546	0.5485	0.565	0.548	0.546	0.547	0.548	0.563	0.552	0.5575		0.553	0.0104403	0.551	0.00567891
260	0.554	0.559	0.554	0.5565	0.57	0.552	0.551	0.5515	0.557	0.569	0.557	0.563		0.560333	0.0085049	0.557	0.00576628
265	0.56	0.563	0.559	0.561	0.577	0.557	0.554	0.5555	0.562	0.58	0.564	0.572		0.566333	0.00929157	0.562833	0.00840139
270	0.573	0.58	0.575	0.5775	0.592	0.571	0.569	0.57	0.574	0.584	0.574	0.579		0.579667	0.0106927	0.5755	0.00482183
275	0.577	0.585	0.58	0.5825	0.593	0.577	0.577	0.577	0.58	0.593	0.588	0.5905		0.583333	0.0085049	0.583333	0.00678847
280	0.588	0.598	0.593	0.5955	0.607	0.585	0.586	0.5855	0.588	0.604	0.59	0.597		0.594333	0.0109697	0.592667	0.00625167
285	0.584	0.6	0.596	0.598	0.61	0.587	0.589	0.588	0.592	0.603	0.593	0.598		0.595333	0.0133167	0.594667	0.0057735
290	0.588	0.607	0.601	0.604	0.611	0.59	0.593	0.5915	0.602	0.609	0.599	0.604		0.600333	0.0115902	0.599833	0.00721688
295	0.585	0.606	0.602	0.604	0.606	0.588	0.59	0.589	0.603	0.611	0.601	0.606		0.598	0.0113578	0.599667	0.00929157
300	0.588	0.611	0.606	0.6085	0.611	0.588	0.593	0.5905	0.607	0.614	0.606	0.61		0.602	0.0122882	0.603	0.0108513
305	0.593	0.614	0.61	0.612	0.621	0.598	0.601	0.5995	0.616	0.622	0.617	0.6195		0.61	0.0149332	0.610333	0.0101036
310	0.593	0.614	0.609	0.6115	0.626	0.601	0.606	0.6035	0.618	0.625	0.619	0.622		0.612333	0.0172143	0.612333	0.00927811
315	0.592	0.614	0.61	0.612	0.624	0.601	0.604	0.6025	0.621	0.625	0.616	0.6205		0.612333	0.017673	0.611667	0.00900463
320	0.589	0.616	0.61	0.613	0.62	0.601	0.605	0.603	0.619	0.623	0.616	0.6195		0.609333	0.0176163	0.611833	0.00831164
325	0.597	0.62	0.618	0.619	0.625	0.604	0.607	0.6055	0.625	0.629	0.625	0.627		0.615667	0.0161658	0.617167	0.0108666
330	0.595	0.621	0.616	0.6185	0.627	0.607	0.61	0.6085	0.626	0.631	0.627	0.629		0.616	0.0181934	0.618667	0.010251
335	0.601	0.629	0.621	0.625	0.634	0.611	0.612	0.6115	0.631	0.641	0.638	0.6395		0.622	0.0182483	0.625333	0.014003
340	0.603	0.631	0.623	0.627	0.638	0.616	0.619	0.6175	0.633	0.64	0.639	0.6395		0.624667	0.0189297	0.628	0.011034
345	0.602	0.629	0.624	0.6265	0.633	0.616	0.617	0.6165	0.634	0.642	0.637	0.6395		0.623	0.0181934	0.6275	0.0115326
350	0.611	0.638	0.633	0.6355	0.645	0.621	0.625	0.623	0.637	0.643	0.641	0.642		0.631	0.0177764	0.6335	0.0096566
355	0.611	0.635	0.631	0.633	0.643	0.624	0.628	0.626	0.639	0.645	0.64	0.6425		0.631	0.0174356	0.633833	0.00828151
360	0.613	0.642	0.636	0.639	0.643	0.624	0.627	0.6255	0.635	0.642	0.639	0.6405		0.630333	0.0155349	0.635	0.00826136
365	0.615	0.641	0.634	0.6375	0.649	0.629	0.633	0.631	0.644	0.654	0.654	0.654		0.636	0.0183576	0.640833	0.0118568
370	0.617	0.643	0.636	0.6395	0.645	0.63	0.631	0.6305	0.644	0.65	0.648	0.649		0.635333	0.015885	0.639667	0.00925113
375	0.624	0.649	0.641	0.645	0.655	0.636	0.638	0.637	0.652	0.661	0.658	0.6595		0.643667	0.0170978	0.647167	0.0114054
380	0.631	0.66	0.654	0.657	0.665	0.649	0.649	0.649	0.655	0.662	0.663	0.6625		0.650333	0.0174738	0.656167	0.00678847
385	0.626	0.655	0.648	0.6515	0.656	0.642	0.645	0.6435	0.655	0.664	0.662	0.663		0.645667	0.0170392	0.652667	0.00980221
390	0.632	0.658	0.65	0.654	0.663	0.647	0.649	0.648	0.665	0.673	0.676	0.6745		0.653333	0.0185023	0.658833	0.0138954
395	0.634	0.662	0.658	0.66	0.663	0.649	0.651	0.65	0.663	0.674	0.675	0.6745		0.653333	0.0167432	0.6615	0.0123187
400	0.649	0.673	0.668	0.6705	0.683	0.666	0.67	0.668	0.675	0.682	0.685	0.6835		0.669	0.0177764	0.674	0.00832166
405	0.644	0.671	0.665	0.668	0.68	0.665	0.669	0.667	0.674	0.682	0.687	0.6845		0.666	0.0192873	0.673167	0.00982768
410	0.654	0.675	0.672	0.6735	0.686	0.667	0.677	0.672	0.677	0.686	0.691	0.6885		0.672333	0.0165025	0.678	0.00912414
415	0.653	0.682	0.676	0.679	0.687	0.674	0.68	0.677	0.683	0.694	0.696	0.695		0.674333	0.0185831	0.683667	0.00986577
420	0.652	0.683	0.673	0.678	0.683	0.671	0.673	0.672	0.682	0.69	0.693	0.6915		0.672333	0.0176163	0.6805	0.00998749
425	0.656	0.686	0.679	0.6825	0.694	0.681	0.683	0.682	0.686	0.698	0.704	0.701		0.678667	0.0200333	0.6885	0.0108282
430	0.661	0.691	0.684	0.6875	0.697	0.683	0.685	0.684	0.691	0.703	0.709	0.706		0.683	0.0192873	0.6925	0.0118216
435	0.655	0.687	0.685	0.686	0.689	0.68	0.684	0.682	0.69	0.701	0.707	0.704		0.678	0.0199249	0.690667	0.0117189
440	0.663	0.692	0.688	0.69	0.696	0.685	0.688	0.6865	0.694	0.704	0.707	0.7055		0.684333	0.0185023	0.694	0.0101119
445	0.671	0.699	0.693	0.696	0.706	0.692	0.696	0.694	0.7	0.709	0.713	0.711		0.692333	0.0187172	0.700333	0.00929157
450	0.669	0.699	0.698	0.6985	0.703	0.692	0.695	0.6935	0.7	0.709	0.715	0.712		0.690667	0.0188237	0.701333	0.00956992
455	0.665	0.696	0.691	0.6935	0.699	0.688	0.693	0.6905	0.702	0.711	0.713	0.712		0.688667	0.0205508	0.698667	0.011644
460	0.672	0.702	0.698	0.7	0.712	0.696	0.701	0.6985	0.708	0.716	0.72	0.718		0.697333	0.0220303	0.7055	0.0108513
465	0.672	0.698	0.698	0.698	0.706	0.694	0.7	0.697	0.707	0.715	0.719	0.717		0.695	0.0199249	0.704	0.0112694
470	0.67	0.698	0.695	0.6965	0.703	0.694	0.696	0.695	0.707	0.715	0.719	0.717		0.693333	0.020306	0.702833	0.0122916
475	0.672	0.703	0.696	0.6995	0.708	0.698	0.699	0.6985	0.708	0.719	0.719	0.719		0.696	0.0207846	0.705667	0.0115578
480	0.675	0.704	0.699	0.7015	0.709	0.698	0.701	0.6995	0.709	0.721	0.722	0.7215		0.697667	0.0196299	0.7075	0.0121655
